# Supplementary material for: The effects of CA IX catalysis products within tumor microenvironment
Source: PubMed Central journal article supplement (PMC3874735; doi:10.1186/1478-811x-11-81), 2013-10-29
Supplement: 1478-811X-11-81-S1.pdf [file 1478-811X-11-81-S1.pdf]

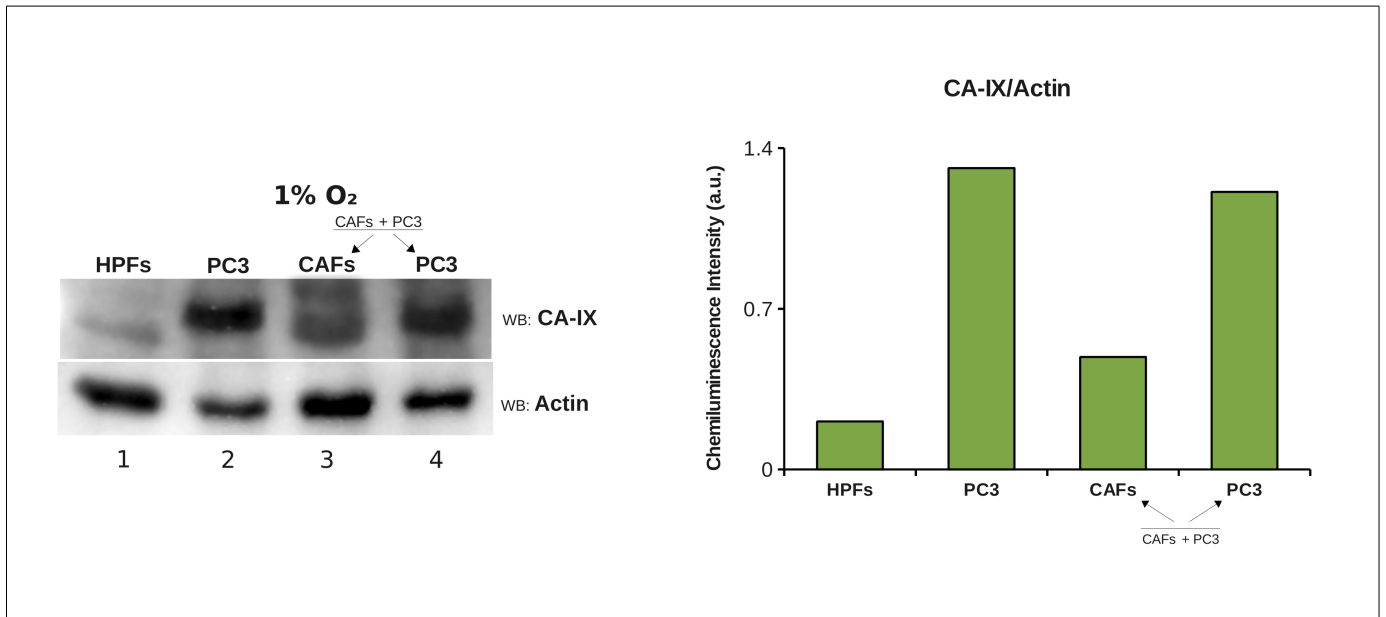

**Additional file 1.** Analysis of CA IX expression in single culture and in coculture. PC3 and fibroblasts were plated in single culture and in coculture in a 1:2 ratio for 40 hours at 1% O<sub>2</sub>. After that the coculture were detached and separated by MACS Column Technology. The samples were lysed in SDS-Laemmli Sample Buffer and used for Western Blot analysis. The membranes were treated with anti-CA IX and anti-actin antibody. Lanes 1 and 2: HPFs and PC3 in single culture. Lanes 3 and 4: CAFs and PC3 after coculture and separation. The graph shows spots quantification using Kodak-MI software. The Western Blot is representative of four independent experiments with similar results.
